# Supplementary material for: Perilipin 5 Ameliorates Hepatic Stellate Cell Activation via SMAD2/3 and SNAIL Signaling Pathways and Suppresses STAT3 Activation
Source: MDPI journal article supplement (doi:10.3390/cells10092184), 2021-08-24
Supplement: s1 [file s1]

**Table S1.** Antibodies used for Western blot analysis

| <b>Primary antibodies</b>    |                 |                   |                   |                                  |                 |
|------------------------------|-----------------|-------------------|-------------------|----------------------------------|-----------------|
| <b>Antibody</b>              | <b>Cat. No.</b> | <b>Clonality</b>  | <b>Supplier</b>   | <b>Reactivity</b>                | <b>Dilution</b> |
| Caveolin 1                   | #3238           | poly - rabbit     | Cell Signaling    | h,m,r,z,hm                       | 1:1,000         |
| Collagen 1                   | ab34710         | poly - rabbit     | Abcam             | h,m                              | 1:1,000         |
| Desmin                       | D93F5           | mono-rabbit       | Cell Signaling    | h,m,r                            | 1:1,000         |
| Vimentin                     | Ab92547         | mono - rabbit     | Abcam             | h,m,r                            | 1:1,000         |
| Fibronectin                  | AB1954          | poly - rabbit     | Millipore-Merck   | h,m,r                            | 1:1,000         |
| $\alpha$ -SMA                | CBL171          | mono - mouse      | Millipore         | h,m,r,e,c                        | 1:1,000         |
| GAPDH                        | sc-32233        | mono - mouse      | Santa Cruz        | h,m,r                            | 1:1,000         |
| GFP                          | sc-8334         | poly - rabbit     | Santa Cruz        | GFP                              | 1:500           |
| PLIN5                        | GP31            | poly - guinea pig | ProGen            | h,m,r                            | 1:1,000         |
| NF- $\kappa$ B               | sc-8008         | mono - mouse      | Santa Cruz        | h,m,r                            | 1:1,000         |
| pNF- $\kappa$ B              | #3031           | rabbit            | Cell Signaling    | h,m,r,mk                         | 1:1,000         |
| p38                          | #9228           | Mouse IgG1        | Cell Signaling    | h,m,r,mk,pg,sc                   | 1:1,000         |
| pp38                         | BD612281        | Mouse IgG1        | BD Bioscience     | h,m,r                            | 1:1,000         |
| ERK1/2                       | #9102           | rabbit            | Cell signaling    | h,m,r,hm,mk,mi,dm,z,b,pg,c<br>e, | 1:1,000         |
| pERK1/2                      | #9101           | rabbit            | Cell Signaling    | h,m,r,hm,mk,mi,dm,z,b,pg,c<br>e  | 1:1,000         |
| JNK                          | #9252L          | rabbit            | Cell Signaling    | h,m,r,hm,mk,z<br>b,sc            | 1:1,000         |
| pJNK                         | #9251S          | rabbit            | Cell Signaling    | h,m,r,hm,mk,d<br>m,b,sc          | 1:1,000         |
| SMAD2                        | #3103           | Mouse IgG1        | Cell Signaling    | h,m,r,mk                         | 1:1,000         |
| pSMAD2/3                     | #8828           | mono-rabbit       | Cell Signaling    | h,m,r,mk                         | 1:1,000         |
| SNAIL                        | #3879           | mono-rabbit       | Cell Signaling    | h,m,r,mk                         | 1:1,000         |
| STAT3                        | sc-7179         | rabbit            | Santa Cruz        | h,m,r                            | 1:1,000         |
| pSTAT3 (Tyr)                 | #9145           | rabbit            | Cell Signaling    | h,m,r,mk                         | 1:2,000         |
| TGF $\beta$ RII              | #79424          | rabbit            | Cell Signaling    | h,m,r                            | 1:1,000         |
| SMAD7                        | sc-365846       | mono-mouse        | Santa Cruz        | h,m,r                            | 1:1,000         |
| N-Cadherin                   | ab98952         | mono - mouse      | Abcam             | h,m,r                            | 1:1000          |
| <b>Secondary antibodies</b>  |                 |                   |                   |                                  |                 |
| <b>Antibody</b>              | <b>Cat. No.</b> | <b>Clonality*</b> | <b>Supplier</b>   | <b>Reactivity</b>                | <b>Dilution</b> |
| goat anti-mouse IgG-HRP      | sc-2005         | poly              | Santa Cruz        | m                                | 1:10,000        |
| goat anti-rabbit IgG-HRP     | 31460           | poly              | Thermo Scientific | rb                               | 1:10,000        |
| goat anti-guinea pig IgG-HRP | AP108P          | poly              | Millipore-Merck   | gp                               | 1:10,000        |

\* Abbreviations used are: mono, monoclonal antibody; poly, polyclonal antibody; h, human; m, mouse; r, rat; rb, rabbit; g, goat; gp, guinea pig; hm, hamster; mk, monkey; mi, mink; c, chicken; dm, *D. melanogaster*; x, *Xenopus*; z, zebrafish; b, bovine; dg, dog; pg, pig; e, equine; ce, *C. elegans*; sc = *S. cerevisiae*.
