# Supplementary material for: Perilipin 5 Ameliorates Hepatic Stellate Cell Activation via SMAD2/3 and SNAIL Signaling Pathways and Suppresses STAT3 Activation
Source: MDPI journal article supplement (doi:10.3390/cells10092184), 2021-08-24
Supplement: s1 [file s1]

**Table S2.** Oligonucleotides used for quantitative real time PCR

| Human Gene                      | Accession No.  | Primers                                   |
|---------------------------------|----------------|-------------------------------------------|
| <i>Smad7</i>                    | NM_005904.3    | forward: 5'-agccgactctgcgaactaga-3'       |
|                                 |                | reverse: 5'-attcgttccccctgtttca-3'        |
| <i>TGF<math>\beta</math>RI</i>  | NM_004612.3    | forward: 5'-aaattgctcgacgatgttcc-3'       |
|                                 |                | reverse: 5'-cataataaggcagttggtaatcttca-3' |
| <i>TGF<math>\beta</math>RII</i> | NM_001024847.2 | forward: 5'-caccgcacgttcagaagtc-3'        |
|                                 |                | reverse: 5'-tggatgggcagtcctattaca-3'      |
| <i><math>\beta</math>-actin</i> | HQ154074.1     | forward: 5'-ccacgaaactaccttcaactcc-3'     |
|                                 |                | reverse: 5'-actcgtcatactcctgcttgct-3'     |
